# Supplementary material for: Exploration of gray matter alterations and cognitive function impairment in adolescents with first-episode non-suicidal self-injury and the associations with self-injury characteristics
Source: PeerJ. 2025 Aug 26;13:e19914. doi: 10.7717/peerj.19914 (PMC12396207; doi:10.7717/peerj.19914)
Supplement: Supplemental Information 1 [file peerj-13-19914-s001.xlsx]

## Sheet: demographic_and_clinical_charac
group	number	age	sex	education	BSSI	Brief Assessment of Cognition in Schizophrenia							Ottawa Self-Injury Inventory
						verbal memory	working memory	motor speed	verbal fluency	executive functions	attention and speed of information processing	total score	internal emotion regulation	social influence	external emotion regulation	sensation seeking	addiction characteristics
1	1	17	1	11	64	41	28	78	23	17	40	227	11	7	4	6	6
1	2	16	2	11	55	29	24	58	29	18	36	194	14	1	4	4	6
1	3	18	1	11	58	41	20	64	19	18	19	181	14	3	5	3	5
1	4	14	1	9	82	30	24	74	24	19	37	208	-	-	-	-	-
1	5	16	1	10	61	40	28	62	26	19	25	200	19	9	12	8	19
1	6	17	1	12	55	28	28	74	24	16	37	207	21	6	12	3	13
1	7	14	1	9	70	30	28	70	24	9	30	191	-	-	-	-	-
1	8	14	1	9	64	19	16	72	19	12	35	173	12	6	4	2	7
1	9	14	1	8	82	37	28	70	22	22	41	220	-	-	-	-	-
1	10	13	1	8	56	45	28	80	23	19	36	231	-	-	-	-	-
1	11	19	2	15	64	38	28	72	24	22	40	224	-	-	-	-	-
1	12	13	1	8	52	43	20	80	25	17	51	236	18	1	9	6	14
1	13	14	1	8	73	34	24	74	28	13	43	216	27	9	7	9	16
1	14	14	1	8	52	44	20	80	25	17	40	226	-	-	-	-	-
1	15	14	1	8	76	55	24	88	21	22	38	248	13	6	5	3	15
1	16	13	1	7	42	40	20	80	23	18	39	220	8	0	2	0	12
1	17	14	1	8	82	49	28	88	27	19	39	250	6	4	8	3	1
1	18	14	1	8	55	37	28	88	27	13	38	231	15	8	12	6	18
1	19	15	1	8	36	28	20	88	27	17	43	223	15	0	12	0	10
1	20	13	1	7	73	40	28	88	32	17	35	240	13	5	9	7	13
1	21	14	1	8	52	31	28	88	27	17	43	234	21	11	9	4	16
1	22	14	1	8	56	35	28	76	11	19	34	203	-	-	-	-	-
1	23	16	1	10	70	125	16	78	17	17	40	293	21	7	0	2	14
1	24	13	1	7	55	45	28	88	32	18	44	255	7	2	2	2	4
1	25	14	1	9	48	32	28	88	21	19	50	238	16	7	8	6	8
1	26	13	1	7	64	19	20	86	15	16	28	184	20	13	10	9	14
1	27	15	1	10	64	24	24	78	26	14	36	202	7	5	8	4	16
1	28	17	1	13	39	35	28	58	20	18	39	198	21	5	9	4	11
1	29	18	1	7	85	18	12	86	18	13	22	169	26	20	16	16	28
2	1	15	1	10		34	28	88	28	17	40	235
2	2	15	1	10		46	28	88	35	17	35	249
2	3	15	2	10		43	28	88	31	19	40	249
2	4	16	1	10		61	28	88	24	17	33	251
2	5	14	2	8		37	28	88	28	18	41	240
2	6	15	1	9		31	28	88	28	17	35	227
2	7	15	2	9		45	28	88	41	18	37	257
2	8	15	2	9		30	28	88	33	18	45	242
2	9	15	2	9		37	28	88	23	19	33	228
2	10	16	2	10		54	28	88	33	19	42	264
2	11	16	2	10		37	28	88	20	12	40	225
2	12	16	1	10		39	28	88	33	13	42	243
2	13	15	1	10		46	28	88	38	22	31	253
2	14	15	1	9		54	28	88	32	14	32	248
2	15	14	1	8		43	28	88	35	17	42	253
2	16	15	1	10		46	28	88	23	18	48	251
2	17	14	1	8		50	28	88	29	21	38	254
2	18	14	1	8		47	28	88	28	22	44	257
2	19	14	1	9		39	28	88	28	18	39	240
2	20	14	1	9		37	28	88	18	16	43	230
2	21	15	1	9		47	28	88	17	19	44	243
2	22	16	1	10		36	28	88	21	14	41	228
2	23	15	1	10		50	28	88	25	18	37	246
2	24	15	1	9		56	28	88	33	19	44	268
2	25	15	1	10		43	28	88	31	19	39	248
2	26	15	1	9		34	28	88	25	18	50	243
2	27	15	1	9		40	28	88	28	19	32	235
2	28	15	1	9		43	28	88	23	16	43	241

## Sheet: subcortical_volume
group	number	LeftThalamusProper	LeftCaudate	LeftPutamen	LeftPallidum	LeftHippocampus	LeftAmygdala	LeftAccumbensarea	RightThalamusProper	RightCaudate	RightPutamen	RightPallidum	RightHippocampus	RightAmygdala	RightAccumbensarea	etiv
1	1	9321.4	3758.8	4346.5	2022	4169.7	1534.3	250.4	8529.7	3364.2	4275.4	1819.7	4448.2	1761.3	488	1.6499e+06
1	2	8337.6	4288.1	4859.5	2166	4227.6	1485.5	311.9	7657.1	4591	5923	2356.7	4309.7	1632.6	435.4	1.58993e+06
1	3	6457.1	2779.4	4535.1	1782	3604.4	1300.6	232	6575.5	3011.9	4710.9	1826.2	4102.6	1376.6	376.9	1.30201e+06
1	4	7819.5	2939.4	4778.1	1976	3790	1208.3	312.2	6794.2	2776.7	4927.1	1874.2	3787.5	1506.6	488.1	1.39098e+06
1	5	7349.6	3322.7	4781.9	2065	4045.5	1375.7	292	7136.5	3651.3	4948.8	1880.7	4213.3	1631.9	400	1.4502e+06
1	6	7778.9	3147.6	4834.1	1844	3958.2	1418.5	216.6	7083.3	3037.9	5112.9	1855.3	4265.1	1561.2	457	1.39656e+06
1	7	8577.7	3388.2	4782.7	1936	3793.6	1325.6	334.2	7725.5	3887.9	4631.4	2011.4	4006.4	1549	478.4	1.61475e+06
1	8	7585.8	2976.5	4558.4	1865	3885.9	1316.3	425.7	6796.8	3040.1	5169.1	2015.4	4190.9	1579	522.1	1.39451e+06
1	9	7888.7	3731.5	4668.5	2065	3660.4	1165.1	284.2	7058.4	3630.4	5123.3	2067.7	3735.2	1682.2	418.9	1.52234e+06
1	10	8254.4	4039.1	5819.3	2171	4333.8	1637.4	210.2	7487.9	3782.5	6038.9	2286.6	4588.1	1831.5	358.2	1.47551e+06
1	11	8012.7	4081.4	4851.2	2167	3932.7	1572.3	221.6	7628.2	3538.2	4890.7	1935.1	4269	1780.8	373.5	1.66122e+06
1	12	8047.4	4105.6	5465.5	2051	3904.8	1509.5	370	7271.6	4470.5	6263.2	2390.3	4040.5	1765.6	496.9	1.66431e+06
1	13	7831.4	3621	5417.5	1810	4193.2	1771.3	325.9	6968.4	3826.9	5491.5	2080	4456.3	2003.7	578.1	1.46874e+06
1	14	9343.5	4239.1	4632.4	2217	4093	1518.8	271.9	7941.1	4330.2	6120.2	2256.1	4333.1	1892.1	561.4	1.67797e+06
1	15	7972	4027.1	5354.5	2231	4358.4	1322.3	199.1	7436.9	4267.9	6376.5	1957.6	4043.4	1757.1	369.3	1.72296e+06
1	16	7229.8	3788.4	5783.7	2328	3882	1707.3	328.3	7063.1	3661	6220.8	2216.3	4425.9	1802.8	548	1.54741e+06
1	17	8941.7	3202.3	4867.4	1707	3862.4	1704.9	314.5	7538.3	3273	5642.6	2059.7	4087.6	1999.6	499	1.55756e+06
1	18	9771.1	3953.2	4605	1982	4274.2	1333.1	362.1	8591.1	4003	4761.2	2335.7	4739.6	1635.9	542.6	1.63778e+06
1	19	7415.5	3501.2	4832.6	1815	3716.6	1426.6	298.6	6881.6	3351.4	5436.5	1714.1	4093.1	1677.9	416	1.51825e+06
1	20	9102.7	3853.2	5196.1	2126	4368.1	1689.3	293.5	7970	4240.4	5843.8	2320.8	4580.9	1848.3	539.4	1.60879e+06
1	21	8500.1	4274.9	5000.4	1964	4038	1387	235.9	7086	4132.2	5563.5	1936.1	4279.4	1712.6	494.1	1.58868e+06
1	22	7186.4	3005.2	4258.1	1721	3800.4	1292.8	295.6	6447.7	2922.3	4696.2	1617.2	4088.6	1626.8	415.2	1.35628e+06
1	23	8035.6	3376.2	4610.5	1924	3464.7	1201.4	248.3	7434.1	3211.1	4762	1952.1	3909.9	1498.5	289.1	1.38252e+06
1	24	8239.9	3393.5	5034	1924	3991.4	1506.6	378.9	7795.1	3609.9	5816.9	2289.9	4301	1573.2	485.2	1.62151e+06
1	25	7848.2	3901	4468.7	1996	3662.3	1460.7	221.6	6760	3451.9	5700.1	1966	4118.8	1657.2	497	1.58049e+06
1	26	9586.7	3804.1	4232.4	1747	4605.2	1584	290	8570.3	3999.4	5533.1	1986.3	4774.5	1632.5	389.8	1.61638e+06
1	27	7225.7	4106.7	4599.8	1694	4005.1	1267	283.3	6699.1	4226.4	5213.7	1973.5	3779.1	1523.6	334.2	1.42643e+06
1	28	7595.1	4307	5153.5	2334	4234.1	1442.8	275.2	7107.2	4229.5	5483.2	2232.9	4354.2	1752.8	500.3	1.61808e+06
1	29	8496.2	3929.5	5204.1	2577	4308.1	1667.7	206.9	7961.1	3989.3	5491	2455	4911.8	1603.3	484.5	1.68252e+06
2	1	7390.4	3716.4	5487.4	2055	3872.7	1341.6	274.5	6937	3562.2	5899.7	2025.4	4218.7	1535.3	400.1	1.3812e+06
2	2	7486.1	3629.6	4853.1	1935	4110.8	1390.7	294.5	7128.1	3503.9	5346.2	1798.6	3882.7	1588.5	446.6	1.37883e+06
2	3	9186.2	4195.7	5945.5	2226	4613.1	1785.4	347.2	8270.4	4484.5	6236.1	2427.9	5213.8	1986	430.9	1.78237e+06
2	4	9339.5	3488.2	5513.7	2216	4141.3	1496.8	346	7516.7	4195.9	6439.4	2439.6	4602.9	1729.5	567.1	1.56882e+06
2	5	8134.2	3618.6	5382.8	1795	3820.3	1381.6	320.5	7396.8	3702.4	6092.9	2065	3905	1875	486.6	1.53352e+06
2	6	9160.2	4639.3	5508.9	2335	4324.2	1627.8	394.4	8316.9	4584.6	6133.9	2134.1	4136.4	1663.3	525.6	1.65972e+06
2	7	8244.9	3732.6	6316.4	2420	4380	1663	435	7939	3935.8	6582.1	2271.6	4475.5	1946.5	514.2	1.71845e+06
2	8	7176.9	4204	6410.7	2059	4251.9	1468.2	281.5	6916.8	3875.4	7146.4	1872.4	4387	1738.6	369.6	1.62798e+06
2	9	9772.9	4374.3	6079.1	2433	4447.7	1413	482.6	8369.6	4137.2	6890.7	2280.6	4615.3	2130.4	569.6	1.8768e+06
2	10	9240.7	3619.5	6153.9	2240	4539.1	1593.2	309.5	9326.2	3775.7	5194.7	2462.5	4778	1710.4	453.9	1.82686e+06
2	11	8198.3	2710	4935.3	1890	3918.6	1231.8	430	7186.7	3144.9	5587.6	2027.8	4285.5	1559.9	465.2	1.48042e+06
2	12	8390.2	3175.5	4743.9	1889	4201.4	1453.2	289	7782.7	3503.1	5430.7	2099.4	4438	1643	500.1	1.57611e+06
2	13	6170.1	2520.8	4760.5	1832	3697.3	1319.2	381.8	6677.1	2943.1	5109.2	1962.4	4149.9	1359.7	426	1.29575e+06
2	14	8032.6	3653.1	5085.2	2207	4070.5	1358.8	269.1	7419.1	4219.5	5901.7	2103.7	4164.8	1564.2	458.7	1.50748e+06
2	15	8919.1	3913.9	5173.2	2255	4081.5	1581.9	344.2	8009.4	3876.8	6075.5	2373.3	4333.3	1975	490.1	1.67181e+06
2	16	7995.8	3591.4	5535.5	1895	3873.2	1373.6	354.2	7255.4	3596.6	5640.1	2155.2	4473.5	1902.8	409.1	1.62424e+06
2	17	8453.7	4926.6	5560	2214	4589.4	1677.7	383.9	7561.4	4453.9	5222.6	2249.4	4496	1787.6	610.5	1749950
2	18	7655.3	3244.6	5034	2181	3936.8	1263	374.3	7818.1	3889.2	5454.4	2384.4	4450.5	1518.6	433.6	1.44484e+06
2	19	8411.1	3498.9	4985	2053	4187	1550.2	184.3	7629.9	3640.8	5195.4	2020.8	4040.9	1820.6	375.5	1.60867e+06
2	20	8762.9	4563.9	5518.6	2221	4048.1	1353.4	353.5	7696.3	4693.9	6508.9	2209.8	4541.9	1604.3	509.2	1.65492e+06
2	21	10520.2	3643.2	4793	2298	4238.7	1614.3	349.1	9263.1	4231.4	5481.7	2519.3	4465.7	1815	521	1.72995e+06
2	22	8597.6	3519.2	4767.9	1861	3995.4	1430.6	396.1	7634.9	4116.6	5602.6	2058.1	4356.9	1724.6	561.1	1.54175e+06
2	23	8214.7	2797.7	4497.6	1635	4066.3	1449.2	243	6953.2	3624.6	5084.6	2051.9	4119.8	1571.5	500.4	1.61121e+06
2	24	7602	4144.4	5339	2043	4163.4	1195.1	263.1	6150.4	4167.1	6195.7	2105.8	4282.1	1502.8	433.6	1.56886e+06
2	25	7925.1	3328	4459.2	2083	4231.9	1644.3	347.1	6787.8	3524.2	5628.2	1924.4	4460.3	1592.3	473.1	1.60168e+06
2	26	9143.7	3632.8	5141.1	1983	3980.3	1401.8	368.7	7264.3	3623.2	5913.5	2225.3	4237.5	1600.6	495.8	1.5625e+06
2	27	7932.6	3536.2	5175.7	1897	4116.3	1586.4	301.1	6468.5	3304.5	4896.4	2137.5	4016.4	1522.1	556.2	1.48015e+06
2	28	8218.7	3646.2	5525.9	2127	3977.7	1424	349.4	7262.3	3579.1	5692.9	2045.1	4408.1	1696.1	451.6	1.49821e+06

## Sheet: cortical_volume
group	number	lh_bankssts_volume	lh_caudalanteriorcingulate_volume	lh_caudalmiddlefrontal_volume	lh_cuneus_volume	lh_entorhinal_volume	lh_fusiform_volume	lh_inferiorparietal_volume	lh_inferiortemporal_volume	lh_isthmuscingulate_volume	lh_lateraloccipital_volume	lh_lateralorbitofrontal_volume	lh_lingual_volume	lh_medialorbitofrontal_volume	lh_middletemporal_volume	lh_parahippocampal_volume	lh_paracentral_volume	lh_parsopercularis_volume	lh_parsorbitalis_volume	lh_parstriangularis_volume	lh_pericalcarine_volume	lh_postcentral_volume	lh_posteriorcingulate_volume	lh_precentral_volume	lh_precuneus_volume	lh_rostralanteriorcingulate_volume	lh_rostralmiddlefrontal_volume	lh_superiorfrontal_volume	lh_superiorparietal_volume	lh_superiortemporal_volume	lh_supramarginal_volume	lh_frontalpole_volume	lh_temporalpole_volume	lh_transversetemporal_volume	lh_insula_volume	BrainSegVolNotVent	eTIV	rh_bankssts_volume	rh_caudalanteriorcingulate_volume	rh_caudalmiddlefrontal_volume	rh_cuneus_volume	rh_entorhinal_volume	rh_fusiform_volume	rh_inferiorparietal_volume	rh_inferiortemporal_volume	rh_isthmuscingulate_volume	rh_lateraloccipital_volume	rh_lateralorbitofrontal_volume	rh_lingual_volume
1	1	1888	1622	8070	3478	2814	10944	12880	13639	2835	13675	7856	6017	6424	9836	2105	4064	5055	2701	3894	2282	9537	2870	14511	11062	2580	16276	24841	15408	10023	10964	1185	3259	1391	7456	1190470	1.6499e+06	2051	1411	7815	3613	2122	10559	16874	11816	3138	13776	7485	5826
1	2	1917	690	6448	2558	2714	10188	11827	13784	3343	11947	7635	5065	6359	11408	1849	3319	3958	2670	4002	1695	9557	2507	14368	11218	2517	17778	27368	14514	12123	12755	1294	3065	1203	7490	1168440	1.58993e+06	2088	2358	6722	2930	2566	10411	18537	12614	2291	9907	8029	6696
1	3	1970	1061	5668	2538	1884	9081	9222	8544	2166	9096	6945	4615	5627	7905	2041	3080	3903	2590	3549	1973	8752	2645	11505	9308	1729	15804	20369	10008	11625	10361	1080	2171	785	5661	925454	1.30201e+06	1833	1329	5203	2394	1588	8202	12685	8890	2295	9934	7208	4591
1	4	1915	2707	6459	2438	1848	9343	11833	8849	2682	12840	7134	4931	5142	11376	1785	3409	4960	2578	3914	1624	10336	3459	13310	9498	2673	14988	23157	13204	11568	10286	1072	2702	1264	7086	1070905	1.39098e+06	2242	1798	5327	3414	2524	7956	13814	11604	2764	12988	7995	5308
1	5	2114	2360	7129	2340	2127	10637	12079	10712	2993	12016	6983	7132	5982	9205	2373	3489	4750	2849	4085	1857	9930	3652	13234	10503	1892	16421	24396	12658	12841	10984	1486	2947	1143	7262	1115136	1.4502e+06	2147	1645	6789	2629	3337	9918	14948	13066	2557	12532	7410	5733
1	6	2168	1825	7392	2196	2121	7705	12258	12613	1833	10012	7124	4622	4739	7945	2140	2893	4051	2132	3175	1710	10346	3150	14032	10223	3175	14802	22005	12145	9847	10485	1004	2796	944	6522	1022870	1.39656e+06	2204	2175	5065	2427	2081	7248	13617	10710	1257	9656	7343	4419
1	7	2410	1060	6496	3289	1907	10392	17117	10488	3056	11636	8215	5879	6121	10556	1571	3336	4958	2712	4599	1890	8788	3458	13256	11421	2849	19073	26331	15404	12736	13966	948	2094	1402	7510	1183512	1.61475e+06	2201	2588	5995	3174	1442	9300	19580	12292	2791	10443	8322	5564
1	8	1760	1251	4930	2391	1600	7647	12314	10344	2304	10523	6333	4265	4560	8142	1430	3239	3900	3086	3759	1694	8760	2651	11669	8817	2019	16177	22867	11546	10931	9237	1274	2617	1146	6309	1059289	1.39451e+06	2082	774	4306	2827	1655	7670	14339	9431	2021	10187	6882	4618
1	9	2659	1216	8445	3547	1970	9692	13667	14526	2723	11433	8638	5189	6395	11550	2241	3563	5486	2671	4422	1680	10566	2382	14697	12294	2694	18423	28210	15502	14841	14218	1373	3054	1438	8960	1197168	1.52234e+06	2152	1240	7580	3013	1933	10328	15358	13509	2208	11662	9601	5741
1	10	2714	1835	5339	2863	2021	9211	12352	11055	2436	9342	7938	6161	5546	11758	1993	3567	5250	2766	4774	1673	8134	3993	13247	10962	2340	15941	23522	15261	11677	9880	1175	2105	1177	7203	1126416	1.47551e+06	2503	1575	5303	2831	1662	9104	15484	11981	2457	11240	7249	4882
1	11	2615	1986	7132	3283	2096	9493	10686	10791	2090	13809	7287	6566	5811	10488	2046	3912	5535	2402	4693	1524	11365	2510	15119	10843	2657	16194	23149	13474	13982	13069	1180	3125	1454	6477	1151224	1.66122e+06	2386	2154	5266	3679	1505	9193	16795	10663	2274	12704	6295	7142
1	12	3059	1798	5781	2847	1706	9690	15825	10749	3135	11101	8322	7292	6178	11313	2228	3749	4518	2811	5287	2070	9349	3001	14388	12378	2321	22605	24752	17203	16732	13974	1534	2758	1350	8548	1241468	1.66431e+06	2894	1732	7585	3281	2179	11370	20022	10714	3364	11846	8335	8176
1	13	2411	887	6351	2599	1992	8882	10602	10615	3023	11593	7655	6468	5281	9647	1945	3707	4689	2612	3907	2069	10525	2855	13272	10200	2367	17040	26288	14392	12860	13078	1206	2308	1030	8040	1103128	1.46874e+06	2372	1929	5571	2658	2141	9087	14485	10063	2756	10878	7954	6637
1	14	2655	2759	7785	3035	3292	10955	17247	14520	2409	13196	8000	6657	6225	10766	2640	4359	4526	3177	4351	2157	11331	4251	16606	10814	3656	20966	27487	14162	13218	10753	1111	3302	1262	7058	1238219	1.67797e+06	2618	2558	7599	3545	1546	11210	19023	13884	3108	12262	8572	7563
1	15	2469	2064	7711	3384	2675	11121	15726	15321	3052	11906	8660	5163	5570	9435	2218	4072	4226	2969	4466	1806	9282	3002	13872	13151	4082	22114	28053	16401	10620	11618	1329	2967	1142	7323	1237195	1.72296e+06	2329	2757	6988	3167	2302	9272	18045	14194	2440	13570	8878	5184
1	16	2098	700	8436	3178	1739	11656	12661	13070	3469	14707	8698	5990	5704	8971	1788	4149	4699	1963	4567	2293	9969	3347	14237	10344	2034	14970	28196	13550	10874	9267	1068	2394	1543	6965	1122551	1.54741e+06	1985	2708	5550	2733	2250	10284	16045	13050	2453	13044	7823	5699
1	17	2774	798	7941	2713	1892	8967	12839	12326	2106	11588	7814	5853	5609	10453	2421	3754	4433	2756	3817	1771	11247	2115	13453	9298	3435	16791	28394	13008	12478	13470	1353	2585	1295	7778	1185216	1.55756e+06	2528	1570	7560	2669	2024	8263	16075	11329	2215	11247	7807	6428
1	18	2911	2061	7319	2851	1917	10395	14608	11108	2984	11422	7985	5699	6274	11795	1975	3834	4915	2799	4022	2000	11167	3780	16554	11266	2790	16900	27410	15618	14395	13714	1223	2792	1378	7205	1233592	1.63778e+06	3208	2512	7066	3048	1993	9836	17676	11681	2546	12227	8111	5620
1	19	2156	1604	6915	4331	1816	9474	13724	10534	3010	11803	8570	6745	6082	11946	1792	3840	4327	2739	4213	2636	9671	2726	12407	10891	2388	16040	24178	15249	12652	13145	1169	2912	1187	7268	1123926	1.51825e+06	2645	2826	5800	3131	1883	11584	15283	10526	3198	11540	7521	6930
1	20	2299	2776	8036	3421	2174	10749	14088	11093	3230	11856	8961	6777	6339	12607	2477	4017	5464	2801	4452	2998	10286	2840	15198	12122	3578	18459	26936	15727	13940	16871	970	3311	1494	7718	1249814	1.60879e+06	2679	2424	8564	3612	2002	10750	18337	12385	2869	12212	8942	7150
1	21	3091	1976	6988	3181	1918	9967	13139	12119	2797	12523	8096	6524	5793	10867	2028	3859	4241	2330	3579	2183	11928	4082	14539	9713	2766	18463	24464	12825	12053	11422	1347	2461	1260	7446	1149261	1.58868e+06	2715	1956	7169	3562	1562	9511	15676	11108	2580	13669	7990	6207
1	22	2724	2833	5858	2945	1338	7230	13483	11342	2302	11346	7664	4698	4958	12041	1659	3147	3598	2632	4065	1975	8424	3650	12647	9066	3186	15078	24850	12802	12659	10566	1083	2566	1045	6769	1033855	1.35628e+06	2240	1596	4677	2531	2145	7540	16660	12839	2358	10873	7585	5554
1	23	2252	1208	4429	3458	1356	10178	13852	7045	2689	12379	7874	5453	5834	6954	2176	3032	5141	2793	5126	2257	8253	2331	12049	9588	2159	15851	24221	13481	15341	10532	1102	3002	1890	7448	1099415	1.38252e+06	2391	1605	3948	3569	1585	9649	14414	11295	2640	11856	7465	6030
1	24	2813	1583	8119	3443	2368	9539	11336	12634	2734	12546	8215	6145	5446	12813	2212	3476	4960	2575	5129	2140	10085	3840	12652	10786	3019	18071	26294	14594	12753	13660	889	2366	1278	8054	1203844	1.62151e+06	2791	1150	6455	3069	1608	9094	16191	11611	2887	12322	9003	5882
1	25	2595	2299	8869	2304	1576	11022	13849	10568	3063	9422	7680	5696	5289	10192	1984	3887	4682	2394	3760	1706	9284	3568	14028	10089	3107	17415	25185	14261	13370	10492	1131	2663	1326	6924	1133488	1.58049e+06	2260	2584	6982	2867	1661	10128	16322	12092	3132	10292	8170	6092
1	26	2956	1577	7864	2510	2180	8196	16485	13122	2937	11843	8768	5637	6028	10066	2315	3008	5259	2760	4180	1885	9722	2384	14515	11584	2267	15897	27106	15172	12784	11282	1491	2652	1185	7311	1171223	1.61638e+06	2744	2149	6778	2765	2486	9510	17249	13954	3028	11429	8510	6320
1	27	2516	1909	6231	3009	1567	9133	11962	12756	2701	9828	7668	4732	6448	11034	1534	2979	4351	2865	4224	1700	8576	2072	12518	8695	1764	15627	22990	11994	12989	9798	1346	3485	1285	7181	1055853	1.42643e+06	1982	1480	5982	3110	1613	8558	14274	11158	2079	10871	8144	5696
1	28	2766	1669	8073	3344	2151	9741	13641	12597	2513	13867	8946	6587	5000	12582	2366	3845	4716	3158	4079	2498	10268	3357	15045	9975	2904	18833	25667	13382	12702	14417	1614	2131	1109	6889	1205077	1.61808e+06	2308	2407	6209	3760	2147	9258	18312	11554	3065	13819	8447	6904
1	29	3233	2153	6537	2423	1353	9350	11658	12255	3389	11353	9358	6632	7030	9506	1865	3181	5461	3126	3670	1587	10408	3994	13054	9917	3172	15505	24075	14232	15771	15490	1052	2619	1728	7980	1211783	1.68252e+06	1772	3898	6826	2990	1621	9467	14190	12566	3130	13348	9983	7481
2	1	2022	1719	5415	2752	2300	9211	9866	9797	2938	9751	6808	6172	4841	11125	2109	2930	4445	2631	3985	1998	8800	3416	11604	10353	2236	14251	24429	13979	9832	10605	1039	2938	763	6874	1019795	1.3812e+06	2153	2347	5191	2807	1854	9033	13718	9192	2549	9118	6566	5760
2	2	2429	2030	6892	2166	2118	8675	10433	10585	2259	8665	7212	4955	4611	10251	1929	3089	3126	2462	3316	1831	8025	2727	12258	9083	2208	13077	20428	12910	10696	9561	970	2749	926	6167	1032588	1.37883e+06	2532	1722	4856	2636	1826	8461	13145	10295	2586	9115	7471	5722
2	3	1932	1314	8334	2966	1929	12076	13879	14303	3579	16429	8246	5869	5462	12548	1906	4098	5495	2639	4031	2015	9222	5268	16222	12770	2555	18607	25847	15386	12718	13082	1254	3316	1106	7615	1301203	1.78237e+06	1568	2141	7686	3979	2529	11271	15921	13932	3149	13412	7901	6856
2	4	2457	1948	6391	2901	1969	10295	15567	10795	2824	10663	8702	6222	5824	11481	1957	4084	4976	3048	4680	1725	9458	3536	15324	11994	2194	17846	28444	15368	12249	12177	1154	2213	1542	7518	1185175	1.56882e+06	2570	2149	7563	2739	1424	8703	15322	10052	3366	11696	8849	6646
2	5	2886	1629	6326	2687	1819	8396	13892	15132	2888	10006	8268	6291	6880	13256	1916	4207	5126	3187	4392	2175	8837	3409	14723	10059	2809	17933	24126	16854	13239	15636	1087	2678	1365	7241	1179577	1.53352e+06	2302	2220	6465	3083	2363	8079	16773	15807	2902	10536	9362	6555
2	6	3101	2051	7796	2768	2252	9912	13514	12240	3430	11298	8008	6666	5026	10207	2292	4058	5369	2615	4260	1986	11191	3646	14750	10497	2285	17133	25111	14686	12336	12965	894	2431	1241	6879	1195676	1.65972e+06	2375	2149	7590	3112	2214	8348	17286	11375	3113	11831	8270	6691
2	7	1753	713	7958	4110	2420	12085	12398	14463	3529	15370	8751	8560	6418	12150	2141	3407	5597	2727	3904	3028	13903	3665	15045	12922	3057	17331	25976	16462	10692	12206	1151	3998	1076	9036	1287922	1.71845e+06	2146	2552	7762	4566	2642	11283	18863	11772	4329	14896	9182	10089
2	8	2220	890	7302	2924	1829	9090	11521	13830	2701	11346	8735	6088	6685	12898	1695	3386	5754	2612	4505	2310	9850	2847	12709	9975	2151	18968	25204	12474	13786	10596	1195	2800	1085	7855	1180453	1.62798e+06	1555	1657	8316	2985	1966	8842	12917	12238	2968	11946	7630	6464
2	9	2643	1863	10208	3083	2390	10234	12130	11500	3027	13928	10168	5131	6997	12599	2124	4872	9558	3656	5365	1827	10618	4031	16014	10904	4003	20989	33257	18691	21769	17901	1106	2703	2736	9019	1436309	1.8768e+06	2705	4114	8314	3436	2474	10263	19080	16390	2992	11221	9573	6513
2	10	2461	2114	7040	3485	2996	10112	12677	12725	2944	10826	9834	8050	5830	11627	1896	3949	5024	3254	4264	3018	10198	3513	15747	10747	2548	20547	30484	14444	14007	16184	1317	2142	1655	9127	1295292	1.82686e+06	2731	2896	6463	3448	2053	10397	18919	12800	2403	14318	9447	7191
2	11	2177	1120	6503	3050	1706	9189	10743	11624	2882	11247	7223	5904	5263	10091	1647	3059	4421	1967	4173	2718	8257	3170	12229	9326	1379	17296	26641	11634	11296	10764	1075	2985	1004	6713	1096328	1.48042e+06	2430	2329	6223	2744	1730	8866	15416	9462	2721	12581	7356	6734
2	12	2040	2765	5843	3839	2131	10176	11040	11125	3125	11835	8555	7715	5550	10235	2234	3896	4991	2976	4218	2839	12853	3035	15206	12585	3012	20117	27917	16299	13720	12983	1059	3960	1161	6861	1208590	1.57611e+06	2473	1736	7010	4470	1804	9778	16569	11603	2494	13344	9202	7045
2	13	2119	566	6810	2365	1847	7915	12222	10141	2548	8845	7083	5107	5096	10945	2008	3080	4412	2614	3077	1687	8017	3348	12206	9232	1432	14605	23827	12693	11426	10167	1157	2853	1167	6358	984911	1.29575e+06	2231	1106	6001	2524	1510	8872	14890	9783	2377	8389	6935	5224
2	14	1799	1411	7387	3056	1702	8015	11325	9748	2648	10275	7114	5724	4847	9928	1828	3339	4031	1807	3311	1897	9287	3200	12453	9999	998	16610	24516	14411	11763	11626	1306	2291	1147	6554	1070875	1.50748e+06	2258	2539	6013	3122	1553	7322	16822	9298	2382	10006	7415	6318
2	15	2286	1635	8790	2277	1768	9981	14224	11221	2616	11784	9400	4864	5742	12335	1944	3348	5545	2655	4320	1249	10895	2750	16002	10403	3277	18798	28868	14610	11430	11596	937	2514	1258	7949	1210527	1.67181e+06	1985	3334	6325	2771	1883	8296	15534	11690	2182	12588	9016	5425
2	16	2830	2205	9102	2682	1836	10653	14819	11803	3549	11061	7559	6320	4514	12812	2196	4203	4706	2734	4099	1913	10486	4028	15568	10980	2614	17301	31154	14968	12633	13466	1576	2381	1247	6284	1205355	1.62424e+06	2749	2767	7189	2721	2030	8454	16381	14634	2639	11729	8251	5998
2	17	2762	1647	9315	3165	2262	10425	13813	14543	3657	11208	8438	6709	6195	11473	2409	3872	5686	3085	4417	2695	12896	2495	16191	14602	2697	20277	27586	15755	12878	14731	1356	2032	1392	7777	1245723	1.74995e+06	2108	2890	8326	3758	1675	10997	16800	13996	3122	13081	8780	6822
2	18	2873	1083	7879	3337	1807	11311	13953	11234	2841	11882	8475	7208	5060	10644	2218	3035	4175	2750	3051	2333	9599	3859	14013	11536	1646	16423	27712	14703	12483	12472	1339	2815	1086	7156	1133496	1.44484e+06	2853	2921	4625	2847	2267	8888	14677	8992	2709	13710	8738	8655
2	19	2973	1497	6957	4049	1772	10051	14472	13761	2834	11278	8255	7690	5416	11135	1770	3091	6370	2738	3794	2527	10451	3824	15187	9910	2314	16510	26518	13257	12111	11972	1146	3339	1030	7505	1173772	1.60867e+06	2181	1855	8363	3250	2001	9062	16063	11202	2697	13351	7249	9115
2	20	3284	573	7293	2356	1832	8862	14015	13108	2631	11641	7466	6384	5400	13018	1826	3965	6397	2300	4649	1659	9442	3545	13872	10879	1740	18853	26785	12496	13718	11386	1029	2268	1082	6990	1226980	1.65492e+06	2742	1392	8167	2778	1583	8118	15838	11682	1322	10418	7254	7211
2	21	2792	675	7909	2951	1540	9885	16206	15530	3374	11915	8422	6676	6178	11259	1744	3550	4971	3324	4299	2282	10087	3637	12773	12391	1918	19396	26466	17454	12346	12221	1279	3505	1026	7797	1303783	1.72995e+06	2862	770	7129	3140	2097	10897	19071	13206	3162	11661	8462	6544
2	22	1815	1094	6528	2881	2389	11253	13596	10732	2860	12250	6864	5521	4704	10268	1867	3711	3332	2493	2993	1544	10627	2586	13081	11168	1653	15564	25600	13892	11964	10236	1017	3352	1088	6206	1137301	1.54175e+06	2533	1502	4963	3223	2119	9809	18705	10290	2730	10144	7144	6246
2	23	2797	1186	7267	2772	1571	9947	14339	10054	3313	12079	7793	5569	5870	10867	2146	3843	5317	2391	4203	1661	9193	3848	12968	11973	2042	14666	24917	15039	11573	12176	1221	2571	1011	6983	1203667	1.61121e+06	2455	2627	6852	2791	1596	9160	16547	10199	2674	11102	7159	5687
2	24	2884	1063	8519	2618	1904	10534	14738	12233	3316	11303	8468	5786	5838	11697	1788	3270	5072	2998	3908	2085	9174	2882	13554	10620	1827	15306	22012	15037	11754	11853	804	2742	1035	7073	1171843	1.56886e+06	2877	1160	7765	2724	1473	9241	15306	12499	2845	10481	9395	6555
2	25	2035	2166	5318	2557	1305	9537	13778	11837	3043	10937	7774	6362	6727	11031	1817	3732	5654	2569	5984	1952	9988	2057	12855	9396	2415	19953	27734	15863	15318	9457	1240	2499	1627	7594	1165602	1.60168e+06	2319	1944	6025	2712	2196	9518	15977	11256	2559	11445	8393	6367
2	26	2149	771	5502	3309	2060	10574	12389	12173	2575	10780	8155	6005	4927	11991	2255	3869	4668	2430	4366	2648	10269	2725	13617	10009	1994	15463	27552	13381	12794	10710	1129	2182	1055	7274	1152633	1.5625e+06	1976	2245	5867	3290	2108	9818	14589	12243	2256	11965	8863	6180
2	27	2510	1798	7894	2659	1426	8986	13959	11205	3058	10675	6354	5861	5955	9891	1811	2917	5437	2697	3843	1649	10400	3292	13273	10608	2787	18244	26029	15235	10713	14488	1366	1542	1138	7660	1123340	1.48015e+06	2483	1666	6840	3048	2345	8334	16208	11746	3068	11220	6958	6050
2	28	2856	1823	5324	2988	2054	9075	14333	9981	3292	12402	7762	4669	4739	9115	2662	3540	3636	2506	3438	1592	8682	3121	11943	12351	2597	15267	25431	14227	11350	11183	1072	2864	947	6529	1129129	1.49821e+06	1862	1850	4680	3141	1893	9837	14863	11236	3027	13041	7946	5605
[truncated: 24 more columns]

## Sheet: cortical_thickness
group	number	lh_bankssts_thickness	lh_caudalanteriorcingulate_thickness	lh_caudalmiddlefrontal_thickness	lh_cuneus_thickness	lh_entorhinal_thickness	lh_fusiform_thickness	lh_inferiorparietal_thickness	lh_inferiortemporal_thickness	lh_isthmuscingulate_thickness	lh_lateraloccipital_thickness	lh_lateralorbitofrontal_thickness	lh_lingual_thickness	lh_medialorbitofrontal_thickness	lh_middletemporal_thickness	lh_parahippocampal_thickness	lh_paracentral_thickness	lh_parsopercularis_thickness	lh_parsorbitalis_thickness	lh_parstriangularis_thickness	lh_pericalcarine_thickness	lh_postcentral_thickness	lh_posteriorcingulate_thickness	lh_precentral_thickness	lh_precuneus_thickness	lh_rostralanteriorcingulate_thickness	lh_rostralmiddlefrontal_thickness	lh_superiorfrontal_thickness	lh_superiorparietal_thickness	lh_superiortemporal_thickness	lh_supramarginal_thickness	lh_frontalpole_thickness	lh_temporalpole_thickness	lh_transversetemporal_thickness	lh_insula_thickness	lh_MeanThickness_thickness	rh_bankssts_thickness	rh_caudalanteriorcingulate_thickness	rh_caudalmiddlefrontal_thickness	rh_cuneus_thickness	rh_entorhinal_thickness	rh_fusiform_thickness	rh_inferiorparietal_thickness	rh_inferiortemporal_thickness	rh_isthmuscingulate_thickness	rh_lateraloccipital_thickness	rh_lateralorbitofrontal_thickness	rh_lingual_thickness	rh_medialorbitofrontal_thickness
1	1	2.364	2.774	2.754	1.962	3.687	2.947	2.562	2.773	2.705	2.197	2.963	1.892	2.396	2.526	2.966	2.579	2.662	2.748	2.595	1.641	2.076	2.63	2.731	2.75	2.702	2.389	2.923	2.383	2.509	2.51	2.791	3.962	2.592	3.262	2.55998	2.534	2.358	2.801	1.861	3.775	2.976	2.521	2.9	2.54	2.231	2.953	1.949	2.719
1	2	2.292	1.983	2.722	1.856	3.816	2.866	2.535	2.952	2.367	2.209	3.109	2.05	3.007	2.927	2.73	2.436	2.576	3.089	2.734	1.629	2.035	1.977	2.566	2.54	3.379	2.627	3.088	2.328	2.758	2.53	3.298	4.119	2.111	3.266	2.60941	2.687	2.59	2.67	1.865	3.669	2.79	2.563	2.838	2.509	2.108	2.951	2.061	2.699
1	3	2.61	2.82	2.882	1.871	3.585	2.925	2.659	2.795	2.735	2.188	3.459	1.844	2.926	3.001	2.902	2.458	2.757	3.105	2.722	1.682	2.181	2.814	2.704	2.601	3.094	2.782	3.061	2.392	3.014	2.739	3.485	3.727	2.419	3.219	2.67988	2.506	2.492	2.781	1.879	3.64	2.858	2.626	2.981	2.59	2.274	2.939	1.859	2.82
1	4	2.3	3.17	2.654	1.619	3.945	2.766	2.471	2.668	2.505	2.048	2.995	1.773	2.287	2.615	3.144	2.483	2.533	3.084	2.638	1.626	2.085	2.926	2.46	2.586	2.777	2.461	2.987	2.315	2.532	2.253	2.961	3.946	2.365	3.416	2.49209	2.59	2.493	2.629	1.85	4.287	2.677	2.53	2.774	2.688	2.159	2.863	1.765	2.381
1	5	2.366	2.992	2.658	1.822	3.4	2.927	2.645	2.786	2.592	2.115	3.062	2.187	2.892	2.798	3.514	2.483	2.586	2.908	2.464	1.814	2.198	2.548	2.553	2.473	2.723	2.339	3.031	2.285	2.737	2.604	3.245	4.064	2.789	3.258	2.58505	2.532	2.27	2.708	1.747	4.033	2.833	2.599	3.065	2.486	2.254	3.205	2.005	2.847
1	6	2.489	2.947	2.744	1.936	3.512	2.732	2.408	2.829	1.845	2.06	2.998	1.75	2.459	2.624	2.974	2.213	2.769	3.087	2.506	1.605	2.17	2.307	2.693	2.473	2.862	2.466	2.989	2.224	2.7	2.711	3.048	3.733	2.623	3.139	2.52767	2.333	2.614	2.464	1.893	4.124	2.76	2.412	2.888	1.697	2.163	2.955	1.821	2.632
1	7	2.21	2.791	2.776	2.3	3.075	2.876	2.521	3.012	2.64	2.154	3.036	2.088	2.603	2.89	2.217	2.33	2.712	2.798	2.643	1.683	2.149	2.496	2.622	2.65	3.024	2.635	3.038	2.337	2.742	2.812	2.767	3.078	2.505	3.233	2.62346	2.571	2.501	2.623	1.961	3.32	2.825	2.494	2.807	2.505	2.313	2.901	2.065	2.492
1	8	2.156	3.157	2.703	1.869	3.265	2.587	2.547	2.747	2.422	2.014	3.073	1.779	2.164	2.411	2.358	2.398	2.692	3.437	2.939	1.54	2.17	2.556	2.376	2.465	2.589	2.703	2.961	2.361	2.596	2.648	3.289	3.314	2.23	3.083	2.51336	2.442	2.679	2.538	1.969	3.225	2.422	2.619	2.71	2.565	2.175	2.812	1.82	2.188
1	9	2.564	2.672	3.039	2.023	3.599	2.898	2.813	3.169	3.034	2.249	3.082	1.865	2.934	2.85	2.876	2.347	2.799	2.969	2.643	1.455	2.295	2.11	2.734	2.753	3.324	2.623	3.169	2.513	2.785	2.925	3.651	3.959	2.52	3.172	2.73244	3.045	1.748	2.771	1.888	4.184	2.724	2.699	3.235	2.048	2.28	3.271	1.761	2.781
1	10	2.499	3.087	2.872	2.039	3.617	2.822	2.735	2.992	2.372	2.168	3.085	2.092	3.021	3.009	2.687	2.585	2.844	3.214	2.934	1.628	2.067	2.83	2.666	2.64	3.058	2.688	3.114	2.396	2.819	2.809	3.753	3.116	2.472	3.175	2.6903	2.831	2.691	2.886	2.143	3.032	2.838	2.63	3.131	2.625	2.318	3.129	1.977	2.887
1	11	2.458	2.586	2.799	1.824	3.405	2.796	2.472	2.978	2.756	2.234	2.864	2.012	2.235	2.615	2.839	2.445	2.585	2.964	2.572	1.313	2.313	2.894	2.615	2.5	2.65	2.533	2.875	2.209	2.814	2.664	2.707	4.091	2.534	3.165	2.55667	2.353	2.66	2.612	1.857	3.454	2.82	2.423	2.933	2.651	2.308	2.835	2.027	2.555
1	12	2.548	3.218	2.575	1.777	3.625	2.942	2.45	2.69	2.919	1.993	2.974	2.032	2.523	2.678	2.902	2.463	2.535	2.921	2.532	1.559	2.084	2.81	2.586	2.372	3.168	2.496	2.834	2.181	3.007	2.632	3.353	3.996	2.61	3.221	2.52819	2.655	2.86	2.941	2.004	3.478	2.884	2.581	2.695	2.726	1.944	2.941	1.972	2.559
1	13	2.493	2.675	2.743	1.879	3.652	2.849	2.559	2.826	2.65	2.224	3.043	2.136	2.781	2.744	2.898	2.464	2.782	3.258	2.559	1.793	2.196	2.789	2.668	2.582	3.164	2.571	3.016	2.291	2.783	2.601	2.692	3.726	2.306	3.278	2.61829	2.412	2.907	2.702	1.751	3.717	2.741	2.518	2.634	2.764	2.205	2.931	1.913	2.507
1	14	2.454	3.111	2.8	1.806	3.648	2.936	2.613	2.92	2.621	2.261	3.149	2.068	2.375	2.87	3.03	2.467	2.82	3.111	2.768	1.683	2.3	2.794	2.887	2.78	3.131	2.638	3.115	2.349	2.872	2.679	2.914	4.158	2.742	3.258	2.68616	2.411	2.883	2.761	1.911	3.828	2.996	2.491	2.913	2.834	2.059	3.367	1.991	2.737
1	15	2.406	2.847	2.742	1.864	3.279	2.711	2.462	2.929	2.512	2.033	2.998	1.785	2.317	2.655	3.144	2.411	2.487	2.842	2.495	1.505	1.97	2.797	2.548	2.572	2.782	2.533	3.016	2.444	2.638	2.646	3.079	3.338	2.523	3.212	2.54479	2.347	2.578	2.638	1.957	3.65	2.501	2.477	2.813	2.648	2.193	2.956	1.757	2.621
1	16	2.223	2.597	2.836	1.867	3.27	2.87	2.307	2.804	2.76	2.19	3.156	1.807	2.457	2.41	2.894	2.455	2.629	2.628	2.687	1.664	2.248	2.932	2.64	2.441	2.758	2.594	3.125	2.168	2.354	2.423	2.59	3.487	2.477	3.173	2.51949	2.259	2.998	2.81	1.888	3.428	2.738	2.49	2.791	2.452	2.488	3.181	1.871	2.404
1	17	2.56	2.747	2.889	1.876	3.228	2.837	2.645	2.729	2.274	2.121	2.895	1.894	2.697	2.691	3.003	2.257	2.741	2.9	2.649	1.556	2.16	2.575	2.667	2.57	3.186	2.505	3.148	2.413	2.655	2.457	3.157	3.415	2.395	2.945	2.57738	2.719	2.443	2.863	1.738	3.834	2.958	2.643	2.891	2.234	2.286	3.335	2.032	2.675
1	18	2.636	2.859	2.792	1.883	3.451	2.965	2.654	2.988	2.638	2.138	2.97	2.022	2.702	3.002	2.869	2.429	2.722	3.159	2.616	1.72	2.315	2.636	2.913	2.651	2.895	2.737	3.021	2.382	2.828	2.695	3.094	3.828	2.327	3.228	2.68396	2.734	2.581	2.79	1.829	3.878	2.816	2.648	2.684	2.572	2.196	2.886	1.922	2.65
1	19	2.453	2.961	2.685	1.976	3.593	2.778	2.533	2.779	2.844	2.137	2.853	2.005	2.769	2.895	2.724	2.485	2.339	2.98	2.535	1.67	2.055	2.498	2.517	2.563	2.998	2.482	2.986	2.301	2.631	2.596	2.843	3.641	2.38	3.116	2.54431	3.035	2.796	2.749	1.977	3.478	2.81	2.584	2.786	2.818	2.134	3.001	2.045	2.694
1	20	2.689	3.273	2.825	2.072	3.148	2.969	2.629	2.851	2.684	2.242	3.497	2.074	2.779	2.895	3.034	2.571	2.803	3.365	2.611	1.882	2.181	2.684	2.685	2.552	3.351	2.76	3.18	2.281	2.856	2.551	2.961	3.655	2.487	3.287	2.68249	2.751	3.066	2.821	2.066	3.378	3.046	2.728	2.983	2.572	2.533	3.122	2.11	2.837
1	21	2.643	2.605	2.754	1.732	3.72	2.889	2.545	2.712	2.546	2.137	2.933	1.994	2.591	2.518	2.833	2.47	2.781	3.049	2.618	1.625	2.206	2.66	2.65	2.542	3.284	2.633	3.024	2.167	2.665	2.476	3.11	3.629	2.441	3.188	2.55282	2.484	2.706	2.751	1.912	3.415	2.652	2.369	2.615	2.525	2.199	3.006	1.874	2.704
1	22	2.714	2.899	2.652	1.883	3.327	2.631	2.56	2.948	2.658	2.223	3.041	1.77	2.33	2.947	2.941	2.373	2.634	3.074	2.719	1.635	2.141	2.46	2.843	2.348	3.123	2.619	2.909	2.361	2.856	2.677	3.476	3.594	2.647	3.235	2.60465	2.681	2.773	2.764	1.995	3.438	2.82	2.746	3.032	2.692	2.249	3.158	2.023	2.295
1	23	2.631	2.47	2.73	1.84	3.795	2.695	2.494	2.499	2.456	2.227	3.08	1.827	2.576	2.645	2.806	2.399	2.652	2.879	2.632	1.49	2.137	2.783	2.573	2.62	3.235	2.49	2.955	2.317	2.876	2.359	3.052	4.127	2.866	3.047	2.54463	2.542	2.353	2.724	2.018	3.57	2.858	2.692	2.75	2.601	2.247	2.935	2.072	2.657
1	24	2.926	2.449	2.837	1.895	3.83	2.887	2.612	2.737	2.506	2.156	3.014	1.846	2.668	2.956	2.72	2.253	2.359	2.63	2.493	1.792	2.224	2.426	2.523	2.604	2.661	2.381	2.895	2.288	2.75	2.568	2.948	3.661	2.267	3.008	2.55027	2.364	1.822	2.746	1.77	3.601	2.997	2.509	2.852	2.853	2.225	3.01	1.941	2.635
1	25	2.47	2.839	2.87	1.805	3.418	2.977	2.399	2.78	2.64	2.028	3.199	1.922	2.608	2.496	2.708	2.459	2.728	2.952	2.747	1.596	1.962	2.59	2.695	2.362	2.794	2.675	2.941	2.163	2.627	2.544	3.522	3.991	2.336	3.358	2.54051	2.528	2.979	2.809	1.985	4.179	2.961	2.383	2.64	2.942	2.046	3.001	1.806	2.921
1	26	2.654	2.561	2.877	1.646	3.713	2.745	2.698	2.73	2.676	2.268	3.108	1.833	2.661	2.271	3.304	2.556	2.797	3.151	2.659	1.625	2.129	2.313	2.742	2.558	3.384	2.63	3.119	2.315	2.619	2.449	3.485	3.924	2.712	3.074	2.59109	2.627	2.512	2.838	1.71	3.579	2.772	2.664	2.961	2.785	2.18	2.909	2.012	2.623
1	27	2.726	3.218	2.782	1.926	3.35	2.954	2.461	2.944	2.884	2.075	3.256	1.868	2.89	2.831	2.197	2.651	2.773	3.199	2.84	1.584	2.073	2.396	2.632	2.54	3.348	2.659	3.149	2.256	2.912	2.527	3.599	4.375	2.52	3.569	2.63882	2.589	2.608	2.673	2.021	3.623	3.053	2.638	2.887	2.219	2.231	3.218	1.831	3.207
1	28	2.685	2.798	2.896	2.063	3.496	2.939	2.692	2.914	2.667	2.304	3.155	1.901	2.645	2.983	3.238	2.519	2.721	2.904	2.534	1.954	2.087	2.637	2.852	2.699	3.115	2.549	2.925	2.362	2.862	2.646	3.442	3.555	2.516	3.39	2.66365	2.433	3.046	2.803	1.989	3.769	2.932	2.539	3.013	2.782	2.446	2.924	2.005	2.794
1	29	2.617	2.463	2.662	1.889	2.97	2.83	2.486	3.119	2.054	2.097	2.934	1.934	2.693	2.855	2.412	2.279	2.646	2.83	2.528	1.59	2.123	2.034	2.663	2.267	2.901	2.432	2.869	2.251	2.706	2.455	2.849	3.789	2.551	3.321	2.51954	2.376	2.601	2.653	1.856	3.591	2.901	2.401	2.809	2.009	2.213	3.05	1.961	2.667
2	1	2.272	2.914	2.984	1.946	3.744	2.919	2.438	2.846	2.496	2.158	2.847	2.045	2.475	2.831	2.826	2.538	2.784	2.831	2.555	1.732	2.085	2.791	2.683	2.713	3.066	2.525	3.154	2.391	2.602	2.601	2.436	3.758	2.257	3.269	2.61335	2.621	2.837	2.739	1.944	3.877	3.116	2.57	2.756	2.452	2.136	2.978	2.149	2.485
2	2	2.437	2.976	2.694	1.778	3.818	2.883	2.5	2.754	2.399	2.094	2.913	2.081	2.365	2.812	3.239	2.302	2.462	3.149	2.444	1.735	1.968	2.668	2.624	2.549	2.805	2.435	2.973	2.205	2.735	2.619	2.822	3.723	2.339	3.364	2.55219	2.806	2.78	2.691	1.686	3.923	2.899	2.577	2.834	2.517	2.214	2.835	2.066	2.535
2	3	2.086	2.5	2.509	1.644	3.561	2.643	2.447	2.829	2.549	2.117	3.197	1.879	2.481	2.533	2.473	2.286	2.493	2.842	2.296	1.526	1.942	3.073	2.446	2.394	2.534	2.51	2.727	2.192	2.546	2.505	2.961	3.913	2.273	3.313	2.45451	2.294	2.591	2.66	1.797	3.595	2.661	2.498	2.804	2.527	2.191	2.945	1.798	2.322
2	4	2.608	2.897	2.876	2.262	3.725	2.917	2.663	3.014	2.484	2.107	3.048	2.138	2.693	3.027	2.835	2.703	2.872	3.064	2.741	1.609	2.163	2.904	2.885	2.728	3.049	2.619	3.133	2.457	2.878	2.721	3.359	3.706	2.462	3.331	2.71582	2.67	2.717	2.994	1.944	4.098	2.92	2.628	2.979	2.704	2.254	3.111	2.03	2.754
2	5	2.755	2.731	2.824	1.938	3.113	2.866	2.629	3.149	2.834	2.146	2.909	2.128	2.816	2.915	2.563	2.66	2.689	2.917	2.54	1.666	2.082	2.524	2.684	2.432	3.088	2.601	3.015	2.444	2.819	2.705	3.144	3.892	2.532	2.982	2.64921	2.825	2.669	2.884	1.92	3.195	2.701	2.512	2.913	2.637	2.18	2.932	2.125	2.733
2	6	2.482	3.009	2.659	1.923	3.492	2.852	2.655	2.653	2.497	2.13	2.844	1.954	2.566	2.65	3.141	2.53	2.605	2.918	2.577	1.609	2.133	2.619	2.62	2.494	2.935	2.425	2.824	2.417	2.702	2.677	2.44	3.498	2.53	3.11	2.55141	2.512	2.604	2.548	1.936	3.277	2.629	2.426	2.715	2.725	2.22	2.89	2.05	2.613
2	7	2.517	2.27	2.802	2.012	3.374	2.965	2.645	3.048	2.467	2.335	3.003	2.005	2.77	2.889	2.799	2.244	2.719	2.883	2.585	1.681	2.166	2.674	2.487	2.536	3.273	2.393	2.878	2.189	2.656	2.485	2.861	3.962	2.469	3.426	2.56824	2.619	2.616	2.785	2.044	3.744	2.827	2.633	3.05	2.798	2.476	3.061	2.112	2.796
2	8	2.576	2.67	2.693	1.795	3.153	2.735	2.381	2.881	2.714	2.075	3.112	1.817	2.756	2.84	2.126	2.267	2.773	2.911	2.654	1.538	2.113	2.881	2.535	2.307	3.163	2.553	2.987	2.071	2.763	2.522	2.725	3.595	1.951	3.078	2.52052	2.317	2.847	2.692	1.78	3.181	2.781	2.313	2.706	2.651	1.989	2.943	1.823	2.582
2	9	2.635	2.143	2.861	1.771	3.275	2.592	2.56	3.064	2.303	2.168	2.846	1.83	2.507	2.855	2.488	2.385	2.891	3.129	2.621	1.466	2.169	2.471	2.652	2.415	2.702	2.638	2.955	2.202	2.829	2.47	2.973	3.532	2.519	3.306	2.5798	2.615	2.568	2.54	1.761	3.459	2.728	2.384	2.689	2.622	2.198	2.907	1.938	2.545
2	10	2.274	2.543	2.748	1.885	3.62	2.978	2.564	2.926	2.417	2.116	2.907	1.983	2.709	2.5	2.457	2.286	2.576	2.717	2.518	1.797	2.098	2.087	2.616	2.51	3.1	2.478	2.956	2.376	2.534	2.622	2.878	3.355	2.342	3.192	2.54364	2.524	2.813	2.736	1.973	3.754	2.776	2.569	2.815	2.458	2.287	2.971	1.834	2.799
2	11	2.388	2.544	2.689	1.791	3.133	2.888	2.467	2.735	2.556	2.12	3.01	1.985	2.746	2.495	2.671	2.387	2.598	3.02	2.735	1.747	2.029	2.369	2.642	2.492	2.89	2.473	3.024	2.209	2.722	2.372	2.797	3.626	2.647	2.929	2.51558	2.444	2.633	2.782	1.708	3.103	2.693	2.408	2.736	2.436	2.218	2.846	2.119	2.723
2	12	2.351	3.099	2.673	2.065	3.86	2.926	2.478	2.997	2.64	2.143	3.203	2.056	2.485	2.762	2.6	2.514	2.651	3.162	2.738	1.715	2.235	2.553	2.759	2.712	2.951	2.568	3.124	2.365	2.887	2.589	2.638	4.329	2.582	3.446	2.63347	2.449	2.443	2.839	2.002	3.508	2.673	2.637	2.823	2.865	2.272	3.138	1.979	2.724
2	13	2.643	2.43	3.119	1.951	3.665	2.901	2.898	3.109	2.874	2.205	3.348	1.914	2.797	3.062	2.868	2.405	2.796	3.353	2.796	1.677	2.21	3.034	2.745	2.846	2.81	2.839	3.425	2.449	2.908	2.709	2.84	4.28	2.81	3.196	2.77706	2.738	2.268	3.046	1.889	3.903	2.966	2.816	3.208	2.943	2.109	3.225	2.042	2.79
2	14	2.351	2.665	2.859	1.813	3.222	2.849	2.416	2.912	2.287	2.032	3.116	1.779	2.459	2.748	2.46	2.218	2.545	2.664	2.535	1.586	1.983	2.32	2.538	2.39	2.712	2.483	2.918	2.148	2.668	2.396	3.23	3.175	2.155	3.157	2.46223	2.287	3.033	2.566	1.784	3.557	2.752	2.415	2.581	2.589	2.13	2.869	1.887	2.396
2	15	2.38	2.758	2.897	1.668	3.355	2.81	2.749	3.034	2.898	2.193	3.205	1.847	2.621	3.045	2.767	2.458	3.041	2.97	2.737	1.367	2.303	2.791	2.809	2.743	3.06	2.596	3.045	2.482	2.628	2.733	3.024	3.773	2.678	3.365	2.69356	2.471	3.256	2.704	1.838	3.628	2.657	2.625	2.98	2.751	2.299	3.038	1.893	2.821
2	16	2.454	3.098	2.725	1.88	3.53	2.833	2.469	2.913	2.74	2.126	3.036	1.932	2.399	2.729	2.773	2.269	2.646	2.891	2.655	1.657	2.077	2.591	2.489	2.58	2.731	2.452	2.932	2.261	2.758	2.457	3.549	3.806	2.719	3.038	2.54316	2.708	2.689	2.626	1.903	3.482	2.792	2.418	2.98	2.593	2.372	3.009	1.98	2.561
2	17	2.399	3.062	2.98	1.898	3.782	2.934	2.597	2.877	2.944	2.091	3.166	2.098	2.55	2.754	2.89	2.719	2.831	3.134	2.818	1.723	2.276	2.412	2.811	2.602	3.368	2.573	3.251	2.397	2.794	2.811	2.864	3.393	2.681	3.609	2.68454	2.495	2.726	2.923	2.003	2.944	2.789	2.578	3.028	2.985	2.279	2.887	1.982	2.719
2	18	3.022	2.813	3.021	2.41	4.005	3.185	2.947	3.149	2.759	2.365	3.583	2.411	2.751	3.038	3.09	2.394	3.066	3.616	3.007	1.903	2.29	3.167	2.734	2.868	3.302	2.893	3.194	2.641	3.124	2.809	3.082	3.983	2.946	3.39	2.86851	3.15	2.851	2.725	2.133	4.247	3.072	2.931	2.843	2.918	2.66	3.29	2.214	2.827
2	19	2.585	2.843	3.053	2.246	3.32	2.91	2.663	2.932	2.651	2.154	3.163	2.159	2.326	2.635	2.759	2.541	2.801	3.054	2.572	1.914	2.26	2.832	2.829	2.71	3.009	2.674	3.192	2.437	2.755	2.527	2.76	4.231	2.326	3.366	2.67834	2.411	2.721	2.782	2.007	3.642	2.807	2.657	2.93	2.865	2.366	3.155	2.163	2.587
2	20	2.263	2.324	2.777	1.584	3.048	2.821	2.368	3.015	2.257	2.064	2.797	1.947	2.313	2.862	2.413	2.381	2.492	2.729	2.305	1.545	2.148	2.661	2.615	2.539	2.555	2.527	2.867	2.224	2.626	2.547	2.702	3.403	2.362	3.244	2.50783	2.57	2.666	2.655	1.559	3.29	2.655	2.414	2.818	1.688	2.077	2.731	1.917	2.451
2	21	2.552	2.458	2.609	1.648	2.972	2.744	2.457	3.083	1.861	2.055	2.871	1.977	2.447	2.669	2.115	2.233	2.407	2.963	2.315	1.442	2.015	2.303	2.489	2.305	2.454	2.417	2.882	2.178	2.553	2.486	3.017	3.873	2.33	3.212	2.44133	2.564	2.489	2.842	1.74	3.296	2.724	2.42	2.922	2.677	2.087	2.666	1.924	2.548
2	22	2.495	2.501	2.837	1.652	3.211	2.849	2.541	2.786	2.827	2.093	3.235	1.94	2.596	2.812	2.954	2.106	2.567	3.069	2.575	1.383	2.125	2.19	2.559	2.486	2.818	2.588	2.993	2.251	2.655	2.79	3.053	3.644	2.406	3.064	2.54447	2.392	2.27	2.735	1.841	3.574	2.823	2.561	2.72	2.616	2.115	2.818	2.12	2.541
2	23	2.501	2.62	2.742	1.923	3.265	3.036	2.513	2.846	2.664	2.221	2.899	2.032	2.586	2.846	3.03	2.386	2.601	2.856	2.609	1.429	1.989	2.866	2.64	2.519	2.864	2.584	2.965	2.314	2.769	2.669	3.19	3.635	2.465	3.286	2.58604	2.512	2.55	2.814	1.712	3.802	2.83	2.613	2.874	2.468	2.191	2.862	1.956	2.26
2	24	2.709	2.97	2.89	1.842	2.909	2.708	2.422	2.875	2.6	1.904	3.164	1.92	2.465	2.931	2.434	2.596	2.598	3.061	2.598	1.628	1.967	2.682	2.518	2.388	2.858	2.552	2.994	2.211	2.849	2.581	2.596	3.522	2.816	3.084	2.52459	2.706	1.74	2.899	1.736	3.706	2.649	2.386	2.683	2.459	2.026	3.2	2.006	2.436
2	25	2.346	2.489	2.715	1.725	2.803	2.777	2.478	2.891	2.625	2.249	2.888	1.91	2.569	2.797	2.45	2.431	2.706	2.853	2.694	1.648	2.191	1.826	2.633	2.452	2.569	2.559	3.005	2.163	2.777	2.368	3	3.988	2.615	3.15	2.5394	2.678	2.457	2.58	1.732	3.3	2.892	2.604	2.863	2.593	2.184	3.052	1.83	2.558
2	26	2.632	2.933	2.741	1.978	3.705	2.874	2.707	2.963	2.427	2.156	3.204	1.909	2.397	3.006	2.917	2.519	2.813	2.879	2.703	1.772	2.215	2.766	2.664	2.656	2.876	2.642	3.117	2.397	2.992	2.844	2.924	3.752	2.429	3.221	2.6756	2.718	2.678	2.728	1.916	3.496	2.867	2.523	2.899	2.384	2.207	3.098	1.845	2.406
2	27	2.405	3.255	2.811	2.213	2.549	2.65	2.591	2.937	2.959	2.248	2.994	2.244	2.634	2.936	2.542	2.27	2.69	3.03	2.749	1.747	2.239	3.152	2.594	2.745	3.23	2.896	3.197	2.245	2.632	2.783	3.748	2.84	2.439	3.263	2.6771	2.716	2.87	3.026	1.977	3.534	2.838	2.552	2.724	2.952	2.384	2.854	2.231	2.816
2	28	2.325	3.489	2.816	1.841	3.2	2.626	2.464	2.568	2.394	2.136	2.847	1.812	2.408	2.45	2.823	2.518	2.367	2.787	2.394	1.486	2.052	2.968	2.449	2.638	2.661	2.478	3.125	2.399	2.496	2.386	3.023	3.884	2.36	3.209	2.50481	2.306	2.997	2.577	2.068	3.471	2.75	2.431	2.712	2.631	2.206	2.841	1.957	2.449
[truncated: 24 more columns]

## Sheet: cortical_area
group	number	lh_bankssts_area	lh_caudalanteriorcingulate_area	lh_caudalmiddlefrontal_area	lh_cuneus_area	lh_entorhinal_area	lh_fusiform_area	lh_inferiorparietal_area	lh_inferiortemporal_area	lh_isthmuscingulate_area	lh_lateraloccipital_area	lh_lateralorbitofrontal_area	lh_lingual_area	lh_medialorbitofrontal_area	lh_middletemporal_area	lh_parahippocampal_area	lh_paracentral_area	lh_parsopercularis_area	lh_parsorbitalis_area	lh_parstriangularis_area	lh_pericalcarine_area	lh_postcentral_area	lh_posteriorcingulate_area	lh_precentral_area	lh_precuneus_area	lh_rostralanteriorcingulate_area	lh_rostralmiddlefrontal_area	lh_superiorfrontal_area	lh_superiorparietal_area	lh_superiortemporal_area	lh_supramarginal_area	lh_frontalpole_area	lh_temporalpole_area	lh_transversetemporal_area	lh_insula_area	lh_WhiteSurfArea_area	rh_bankssts_area	rh_caudalanteriorcingulate_area	rh_caudalmiddlefrontal_area	rh_cuneus_area	rh_entorhinal_area	rh_fusiform_area	rh_inferiorparietal_area	rh_inferiortemporal_area	rh_isthmuscingulate_area	rh_lateraloccipital_area	rh_lateralorbitofrontal_area	rh_lingual_area	rh_medialorbitofrontal_area
1	1	840	595	2650	1682	522	3151	4559	4108	908	5927	2326	3183	2345	3390	617	1529	1683	692	1330	1529	4188	985	4998	3727	862	5847	7389	5808	3675	4059	265	537	476	2337	88705.8	880	636	2473	1912	388	3105	5917	3416	964	5838	2238	3058	1940
1	2	874	444	2137	1370	506	2989	4267	3857	1182	4861	2178	2359	1672	3138	586	1290	1350	608	1168	1080	4238	1210	5058	4139	635	5791	7706	5524	3892	4594	259	464	511	2260	84190	842	710	2264	1483	439	3074	6398	3774	837	4260	2407	2897	1888
1	3	802	379	1728	1319	339	2581	3173	2600	691	3810	1713	2496	1693	2197	620	1169	1277	540	1120	1314	3498	792	3878	3231	472	4843	5801	3765	3152	3370	214	350	329	1904	67053.1	740	449	1626	1208	310	2568	4079	2477	725	3988	2146	2421	1572
1	4	897	784	2220	1508	350	2860	4266	2857	944	5913	2054	2795	2033	3594	499	1298	1723	626	1196	1126	4486	1068	5002	3225	817	4961	6662	5078	4103	4140	244	455	482	2014	82278.4	919	584	1749	1711	380	2703	4788	3500	843	5644	2428	2996	1865
1	5	933	705	2446	1236	522	3094	4029	3237	978	5275	1886	3017	1601	2859	589	1274	1544	619	1340	1135	4067	1210	4720	3809	610	5923	6849	5049	3980	3719	263	477	408	2132	81489	885	599	2157	1428	508	3057	5004	3445	930	5154	1931	2880	1525
1	6	965	540	2403	1050	378	2487	4705	3810	884	4299	2064	2635	1733	2722	616	1293	1266	474	1080	1187	4233	1251	4825	3905	888	5108	6266	4967	3074	3661	193	452	348	2042	77803.2	962	616	1748	1186	319	2443	5120	2886	694	4162	2194	2362	1717
1	7	1035	393	2190	1305	444	3115	6025	2891	943	4935	2234	2753	1948	3018	683	1439	1567	668	1431	1295	3632	1216	4679	4018	802	6206	7414	5896	3905	4418	229	440	528	2267	85941	904	853	2000	1515	375	3075	7163	3763	873	4281	2381	2716	2259
1	8	900	371	1796	1219	334	2833	4511	3190	879	5119	1931	2564	1816	3176	534	1303	1258	574	984	1223	3856	968	4764	3375	730	5006	6694	4624	3741	3228	242	453	470	2041	76706	894	318	1703	1270	363	3100	4863	3060	644	4418	2159	2465	1890
1	9	1049	445	2453	1624	410	2847	4356	3806	869	4709	2541	2862	1853	3570	720	1473	1699	674	1391	1308	4194	1092	4976	4142	688	5931	7420	5478	4722	4361	268	487	528	2826	87596	691	658	2350	1610	291	3315	4851	3250	956	4781	2666	3246	2171
1	10	1127	502	1702	1297	359	2759	4024	3072	881	4079	2292	2744	1533	3200	664	1302	1547	611	1365	1096	3579	1213	4488	3720	631	5118	6326	5631	3707	3073	197	438	457	2242	76965.9	957	520	1599	1180	373	2936	5123	3182	761	4450	2115	2329	1708
1	11	1116	750	2346	1703	422	3121	3827	3234	708	5505	2246	3203	2359	3415	663	1587	1926	587	1637	1332	4529	880	5514	4071	932	5790	7203	5523	4410	4538	278	439	510	2170	88472	1085	674	1776	1804	331	2955	6212	3129	770	4990	2016	3512	1552
1	12	1275	470	2082	1524	325	2843	5849	3336	898	5316	2254	3400	1893	3535	658	1467	1567	666	1745	1413	4204	997	5147	4709	592	7476	7392	7026	4502	4799	272	340	521	2682	93171.1	1119	580	2294	1506	429	3370	6742	3477	1001	5999	2394	3868	1838
1	13	976	406	2182	1321	352	2793	3777	2930	978	4749	2093	2919	1541	2910	625	1397	1464	550	1285	1214	4229	975	4509	3689	593	5695	7354	5572	4136	4534	261	357	424	2378	81100.1	1011	470	1916	1457	367	3028	5060	3125	869	4453	2422	3347	1905
1	14	1143	768	2487	1633	589	3146	5867	3896	818	5354	2126	3120	2219	3179	734	1652	1394	671	1290	1472	4359	1293	5204	3606	909	6579	7737	5527	3879	3654	250	458	465	2115	89588.5	1127	709	2413	1753	288	3193	6717	3918	991	5755	2062	3639	1874
1	15	1101	679	2585	1783	652	3622	5593	4405	1051	5373	2388	2943	2101	3043	594	1561	1564	661	1512	1384	4222	992	5073	4690	1155	7512	7928	5947	3462	3921	290	554	457	2261	93051.6	1031	782	2396	1479	449	3342	6500	4183	854	5598	2468	2980	1851
1	16	1016	306	2554	1658	369	3306	4830	4100	1077	6123	2240	3209	2045	3419	569	1563	1480	539	1356	1495	3940	990	4759	4003	661	4879	7475	5530	4245	3558	257	433	542	2191	86709.3	936	699	1638	1371	418	3339	5451	3982	865	4789	2028	3016	1998
1	17	1186	357	2506	1348	413	2838	4460	4014	817	5033	2348	3055	1786	3285	690	1596	1386	675	1176	1326	4898	834	4586	3424	889	5754	7672	4908	4195	5238	271	458	573	2599	86591.6	974	558	2415	1476	313	2632	5371	3249	834	4622	1989	3065	1955
1	18	1196	600	2514	1449	462	3206	5014	3157	1007	4977	2417	2607	1908	3322	605	1541	1559	657	1246	1308	4412	1281	5168	3978	869	5269	7869	5834	4464	4788	234	490	549	2247	88199	1244	739	2324	1586	403	3195	5835	3802	817	5105	2493	2813	2178
1	19	859	507	2318	2004	374	2917	4937	3310	901	5213	2642	3187	1789	3402	588	1461	1648	650	1416	1716	4348	1078	4747	3636	664	5569	7033	6084	4280	4707	269	577	425	2347	87585.8	975	885	1974	1483	368	3480	5304	3287	1036	4988	2143	3133	1757
1	20	845	636	2535	1445	559	3109	4907	3407	1061	4859	2190	3147	2001	3518	750	1438	1702	568	1371	1615	4302	1016	5208	4291	889	5454	7398	6185	4241	6104	238	499	529	2389	90391.8	1000	610	2633	1579	347	3084	5863	3552	913	4539	2621	3178	2055
1	21	1269	632	2275	1769	417	3026	4591	3974	959	5528	2360	3188	1929	3730	601	1441	1298	547	1119	1512	4770	1310	4937	3547	661	5594	6726	5308	4139	4275	250	464	497	2347	86982.7	1153	589	2252	1838	355	3203	5813	3682	852	5788	2279	3174	1939
1	22	1059	694	2105	1480	306	2554	4813	3305	773	4563	2134	2704	1920	3398	510	1253	1276	600	1160	1295	3631	1326	4099	3522	780	4752	7370	4909	3687	3658	179	444	411	2145	78802.7	885	551	1569	1184	365	2400	5326	3338	723	4586	1981	2833	1953
1	23	857	458	1585	1831	254	3454	5234	2618	936	5232	2396	2927	2009	2398	677	1250	1727	714	1659	1638	3618	789	4324	3456	592	5551	7074	5475	4758	4225	221	507	579	2619	83555.8	960	545	1317	1574	317	2995	4894	3841	889	5232	2314	2846	1751
1	24	1029	545	2617	1717	396	2843	4033	4009	956	5526	2437	3271	1678	3514	725	1525	1927	699	1652	1321	4086	1462	4752	3863	938	6617	8132	5710	4079	4763	198	480	491	2646	90623.7	1246	543	2162	1650	370	2835	5987	3617	820	5116	2616	3047	1960
1	25	1157	651	2735	1152	331	3002	5074	3129	989	4427	2061	2750	1714	3452	625	1469	1497	578	1125	1174	4414	1259	4829	3799	902	5533	7367	5956	4596	3906	202	387	536	2023	84801.3	956	691	2291	1256	245	2898	5881	3917	901	4589	2353	3160	1716
1	26	1227	542	2413	1531	436	2752	5231	4063	920	4545	2303	2964	1890	4274	609	1174	1627	590	1263	1229	4039	990	4779	4158	542	4907	7100	5603	4168	4235	257	478	455	2236	85520.5	1098	669	2049	1496	419	3057	5449	3935	818	4746	2447	2914	2023
1	27	979	487	2052	1424	326	2492	4352	3443	739	4379	2010	2440	1806	3233	641	1024	1352	614	1210	1201	3730	718	4339	3026	430	4867	6176	4692	3696	3554	222	365	458	1973	74440.7	847	449	1981	1420	313	2574	4574	3040	761	4453	2237	3107	1383
1	28	1082	507	2447	1600	453	2978	4844	3751	881	5771	2371	3403	1776	3624	632	1480	1529	759	1374	1464	4568	1162	4869	3449	767	6192	7598	5088	3937	5069	275	392	437	2017	88544.7	1017	621	2029	1753	355	2927	6459	3511	917	5242	2532	3479	1798
1	29	1196	681	2193	1173	397	3037	4403	3058	1510	5103	2847	3367	2302	2832	726	1356	1794	859	1285	1112	4426	1973	4672	4222	940	5391	7640	5616	5282	5863	232	476	617	2417	90980.2	876	1287	2333	1591	343	3043	5382	3989	1377	5663	2978	3634	1789
2	1	912	525	1664	1313	488	2629	3825	2985	1030	4222	2111	2901	1676	3204	604	1065	1385	657	1293	1294	3715	1091	3962	3445	622	4684	6733	5186	3463	3631	242	542	316	2100	75512.2	899	711	1713	1284	321	2574	4784	2979	863	3916	1893	2457	1683
2	2	1083	533	2306	1135	437	2644	3894	3231	798	3799	2153	2268	1713	3016	525	1273	1135	583	1205	1160	3739	973	4384	3302	708	4588	6065	5242	3550	3287	214	529	399	1844	73711.5	951	491	1618	1522	307	2587	4644	3153	847	3820	2380	2569	1661
2	3	989	492	3038	1739	404	3813	5083	4479	1217	7159	2182	2910	1811	4395	681	1819	1974	675	1463	1477	4422	1453	6199	4969	930	6413	8394	6282	4561	4867	272	536	458	2300	99775.9	715	631	2491	2016	467	3663	5537	4163	1035	5536	2323	3830	2473
2	4	914	600	2079	1170	383	3120	5259	2919	1061	4704	2339	2791	1801	3161	616	1448	1513	700	1422	1147	3942	1034	4800	4040	699	5625	7577	5682	3758	4016	208	407	556	2193	83682.9	1017	610	2291	1369	240	2701	5065	2892	1069	4769	2433	3178	1935
2	5	1073	500	2151	1286	455	2751	4901	4190	882	4384	2442	2766	2015	3845	660	1390	1690	820	1457	1456	3985	1274	5064	3990	820	5894	7201	6007	4281	5252	240	432	475	2444	88468.6	927	628	1994	1419	473	2773	6035	4775	901	4521	2901	2905	2247
2	6	1331	551	2672	1330	509	3085	4695	4015	1210	4925	2300	3344	1688	3336	636	1509	1845	646	1380	1304	4665	1153	5217	3743	683	5922	7599	5424	3964	4406	237	484	442	2190	88433.8	972	669	2647	1511	466	2779	6307	3440	979	5157	2457	3147	1712
2	7	745	406	2524	1894	489	3583	4317	4037	1215	5998	2414	4036	1925	3404	688	1455	1767	655	1218	1989	5722	1248	5668	4782	796	5983	7795	6671	3639	4537	267	599	392	2617	95472.2	873	768	2460	1987	429	3475	6244	3264	1239	5419	2640	4441	2213
2	8	830	383	2561	1528	387	2905	4464	3875	866	5240	2358	3094	2051	3826	722	1487	1809	592	1439	1660	4074	908	4665	3945	638	6195	7420	5528	4287	3737	286	509	521	2554	87338.4	680	511	2622	1593	480	2950	4896	3841	910	5667	2203	3407	2139
2	9	1081	787	3232	1708	509	3732	4373	3205	1152	5849	3168	2808	2463	3542	780	1873	2799	907	1806	1375	4559	1462	5709	4242	1191	7034	10000	7716	6787	7138	247	496	1115	2799	107632	1139	1318	2919	1902	442	3551	7315	5308	949	4645	3139	3302	2518
2	10	1168	705	2366	1722	529	3040	4488	3652	1036	4757	2858	3743	1768	4136	707	1664	1699	903	1475	1809	4413	1619	5609	4076	672	6900	8930	5354	5163	5626	295	453	613	2850	96716.5	1112	935	2123	1648	375	3358	6604	3851	827	5810	2774	3814	2083
2	11	960	431	2244	1622	394	2780	3988	3804	987	4879	2114	2896	1629	3529	573	1214	1454	513	1320	1674	3688	1219	4243	3486	517	5931	7604	4800	3560	4277	257	530	360	2286	81755.7	1090	677	2071	1484	380	2821	5892	3132	960	5175	2270	2990	1811
2	12	891	735	2033	1726	377	2918	4254	3183	1079	5327	2252	3636	1840	3180	758	1480	1546	714	1248	1813	5183	1025	5008	4404	820	6271	7689	6145	3932	4620	262	585	461	1933	89327.7	1129	603	2171	2123	352	3219	5765	3637	814	5528	2571	3483	1687
2	13	829	314	1958	1135	372	2425	3831	2644	778	3735	1789	2541	1478	2831	601	1284	1368	541	953	1121	3277	926	3945	2992	473	4225	5752	4608	3381	3473	237	381	402	1913	68507.5	867	493	1767	1220	277	2694	4710	2521	688	3905	1996	2457	1483
2	14	818	493	2380	1538	381	2614	4292	2719	1066	4639	1929	3159	1699	2819	673	1481	1432	476	1108	1312	4226	1240	4468	3955	356	5488	7280	5964	3820	4358	250	467	498	1994	81387.2	1051	755	2176	1624	278	2524	6022	2890	790	4515	2393	3265	1711
2	15	986	519	2700	1352	358	3129	4755	3127	821	4913	2379	2609	1848	3396	635	1286	1488	665	1341	1045	4166	960	5212	3562	839	6230	8134	5347	3936	3867	197	460	495	2273	85029	819	850	2145	1438	315	2911	5221	3381	696	5082	2508	2876	1911
2	16	1244	604	3003	1319	403	3217	5395	3441	1184	4726	1985	3146	1698	3824	675	1773	1529	606	1259	1261	4636	1378	5779	3903	868	5987	9217	5894	3802	5254	245	381	433	2084	92009.4	1088	788	2469	1301	366	2707	5821	3908	848	4384	2288	2892	2125
2	17	1203	504	2785	1580	409	2879	4636	3977	1014	4787	2166	2999	1989	3496	668	1346	1712	664	1306	1689	4942	954	5306	4860	665	6428	7076	5772	4128	4741	257	376	503	2074	89884.3	858	794	2568	1737	476	3353	5644	3668	943	5259	2639	3200	1699
2	18	1011	366	2382	1276	303	3077	4273	3046	879	4543	1864	2714	1537	2603	636	1311	1165	528	850	1374	3872	962	4656	3600	377	4729	7331	4899	3287	4064	237	368	346	1949	76405.4	995	702	1518	1274	299	2438	4523	2854	746	4623	2195	3543	1795
2	19	1235	488	2049	1562	413	2893	4884	4006	977	5009	2077	3163	1965	3676	572	1188	1885	608	1297	1389	4157	1208	4844	3225	618	4978	6940	4873	3850	4616	275	398	433	2188	83933.4	942	510	2517	1466	329	2832	5313	3222	817	5113	2015	3977	1691
2	20	1531	302	2487	1469	465	2915	5359	3545	1082	5436	2299	3178	2072	3922	683	1625	2354	641	1790	1192	4118	1141	5000	4081	603	6392	8423	5120	4644	4261	244	415	507	2240	91527.9	1126	524	2841	1748	356	2809	6063	3495	727	4712	2383	3624	1916
2	21	1130	321	2762	1758	425	3341	6196	4260	1912	5714	2456	3465	2119	3548	769	1559	1878	756	1582	1772	4735	1610	4913	5458	719	6799	8159	7342	4201	4606	240	608	418	2432	99962	1231	408	2281	1821	427	3755	6903	4013	1075	5465	2762	3398	2126
2	22	732	475	2141	1754	557	3294	4930	3145	972	5525	1879	2778	1446	3125	586	1700	1165	563	947	1260	4520	1211	4749	4228	577	5175	7567	5744	3821	3469	219	522	415	1984	83173.4	1096	601	1680	1636	394	2962	6605	3265	879	4581	2272	2874	1788
2	23	1139	437	2415	1423	407	2945	5321	2960	1110	5072	2278	2706	1800	3203	622	1577	1831	644	1368	1353	4273	1227	4652	4513	667	4840	7505	5972	3679	4200	247	424	362	2138	85295.4	1061	837	2164	1532	321	2907	5716	3106	903	4798	2279	2889	2077
2	24	1118	338	2623	1309	456	3203	5440	3528	1121	5596	2165	2857	1968	3289	670	1075	1722	682	1257	1365	4302	1002	5002	4175	549	5012	6353	6017	3547	4106	235	493	357	2262	85184.6	1108	611	2451	1476	307	3068	5736	3903	1022	4818	2461	3231	1975
2	25	910	765	1941	1408	374	3232	5080	3375	979	4584	2276	3383	2199	3203	673	1468	1728	669	1737	1297	4127	1128	4471	3558	712	6757	8025	6712	4651	3703	260	369	564	2397	88694.1	909	667	2173	1555	453	3070	5478	3454	856	4839	2338	3632	1865
2	26	847	301	1885	1565	456	3159	4289	3487	964	4546	2169	3067	1811	3305	696	1501	1478	650	1338	1585	4109	919	4761	3383	625	4925	7657	5248	3618	3448	249	440	417	2182	81079	771	669	1939	1604	450	3149	5182	3786	816	5025	2513	3239	1968
2	27	1055	467	2375	1066	390	3101	4764	3043	865	4088	1748	2378	1830	2591	644	1191	1670	602	1130	1039	4018	952	4735	3499	649	4931	6666	5768	3541	4345	233	415	421	2267	78384.4	963	533	1976	1292	415	2613	5620	3295	826	4094	2122	2514	1751
2	28	1253	474	1673	1599	569	2943	5365	3453	1226	5585	2338	2549	1718	3450	833	1391	1360	631	1192	1244	3844	1003	4566	4386	846	5200	7116	5408	4426	4609	228	470	402	2108	85457.1	810	549	1682	1375	431	3102	5320	3655	951	5657	2537	2831	1893
[truncated: 24 more columns]
