# Supplementary material for: Exploration of gray matter alterations and cognitive function impairment in adolescents with first-episode non-suicidal self-injury and the associations with self-injury characteristics
Source: PeerJ. 2025 Aug 26;13:e19914. doi: 10.7717/peerj.19914 (PMC12396207; doi:10.7717/peerj.19914)
Supplement: Supplemental Information 5 [file peerj-13-19914-s005.xlsx]

## Sheet: Sheet1
Variable Name	Variable Label	Data Type	Coding Scheme	Value Range
Group	Group Classification	Numeric (Categorical)	1 = Non-Suicidal Self-Injury Group, 2= Healthy Control Group	1-2
Sex	Individual's Biological Sex	Numeric (Categorical)	1=Female, 2=Male	1-2
Ottawa Self-Injury Inventory	Score of the Ottawa Self-Injury Inventory Scale	Numeric (Continuous)	0-100 represents different ability levels, “-”represents the absence of data	0-36
